# Supplementary material for: Microarray data mining: A novel optimization-based approach to uncover biologically coherent structures
Source: PubMed Central journal article supplement (PMC2442101; doi:10.1186/1471-2105-9-268), 2008-06-06
Supplement: 1471-2105-9-268-S5.pdf [file 1471-2105-9-268-S5.pdf]

## **Additional file 5 – Availability of datasets**

### **Dataset I**

Available for download from [[http://biology.plosjournals.org/archive/1545-7885/2/5/supinfo/10.1371\\_journal.pbio.0020128.st001.txt](http://biology.plosjournals.org/archive/1545-7885/2/5/supinfo/10.1371_journal.pbio.0020128.st001.txt)]. The citation is Wang et al., PLoS Biology 2(5):E128 (2004).

### **Dataset II**

Available publicly from PUMAdb, the Princeton University microarray database [<http://puma.princeton.edu>]. The link is [[http://puma.princeton.edu/cgi-bin/exptsets/viewExptSets.pl?exptset\\_no=5078](http://puma.princeton.edu/cgi-bin/exptsets/viewExptSets.pl?exptset_no=5078)].

### **Dataset III**

Reported in Brem and Kruglyak, PNAS 102:1572 (2005) and is deposited in the Gene Expression Omnibus database (accession no. GSE1990 [[NCBI GEO](#)] ).
